Articles of interest in other COB journals

From *Journal of Cell Science*

**Cdc42 acts downstream of Bazooka to regulate neuroblast polarity through Par-6–aPKC**

Scott X. Atwood, Chiswili Chabu, Rhiannon R. Penkert, Chris Q. Doe and Kenneth E. Prehoda

Atwood, S. X. et al. 2007. *J. Cell Sci.* doi:10.1242/jcs.014902

**Requirements for adherens junction components in the interaction between epithelial tissues during dorsal closure in *Drosophila***

Nicole Gorfinkiel and Alfonso Martinez Arias

Gorfinkiel, N. et al. 2007. *J. Cell Sci.* doi:10.1242/jcs.010850
